# Supplementary material for: Sources of Secondary Metabolite Variation in Dysidea avara (Porifera: Demospongiae): The Importance of Having Good Neighbors
Source: MDPI journal article supplement (doi:10.3390/md11020489), 2013-02-18
Supplement: s1 [file s1]

marinedrugs-11-00489-s001.mol
  corina  05201405173D 1   1.00000     0.00000 
CORINA 3.49 0023  12.04.2013
 24 26  0  0  0  0  0  0  0  0999 V2000
    0.3553    1.6856   -0.3440 C   0  0  0  0  0  0  0  0  0  0  0  0
    0.5187    0.1999   -0.4692 C   0  0  0  0  0  0  0  0  0  0  0  0
    1.5923   -0.4063   -0.8707 C   0  0  0  0  0  0  0  0  0  0  0  0
    2.8461    0.3324   -1.2695 C   0  0  0  0  0  0  0  0  0  0  0  0
    2.4534    1.7580   -1.6266 C   0  0  0  0  0  0  0  0  0  0  0  0
    1.7194    2.3873   -0.4434 C   0  0  0  0  0  0  0  0  0  0  0  0
    3.5307   -0.3413   -2.4536 C   0  0  0  0  0  0  0  0  0  0  0  0
    4.7368    0.4954   -2.8909 C   0  0  0  0  0  0  0  0  0  0  0  0
    4.2800    1.8821   -3.3297 C   0  0  0  0  0  0  0  0  0  0  0  0
    3.5610    2.6184   -2.1915 C   0  0  0  0  0  0  0  0  0  0  0  0
    3.7807    0.2699   -0.0607 C   0  0  0  0  0  0  0  0  0  0  0  0
    1.5881   -1.9100   -0.9301 C   0  0  0  0  0  0  0  0  0  0  0  0
    5.4959    2.7034   -3.7679 C   0  0  0  0  0  0  0  0  0  0  0  0
    4.5619    3.0877   -1.1418 C   0  0  0  0  0  0  0  0  0  0  0  0
    2.9226    3.8805   -2.8207 C   0  0  0  0  0  0  0  0  0  0  0  0
    2.1816    4.6513   -1.7587 C   0  0  0  0  0  0  0  0  0  0  0  0
    0.8024    4.6023   -1.7055 C   0  0  0  0  0  0  0  0  0  0  0  0
    0.1203    5.3122   -0.7282 C   0  0  0  0  0  0  0  0  0  0  0  0
    0.8233    6.0711    0.1953 C   0  0  0  0  0  0  0  0  0  0  0  0
    2.2030    6.1198    0.1424 C   0  0  0  0  0  0  0  0  0  0  0  0
    2.8852    5.4055   -0.8310 C   0  0  0  0  0  0  0  0  0  0  0  0
    4.2432    5.4530   -0.8829 O   0  0  0  0  0  0  0  0  0  0  0  0
   -1.2376    5.2643   -0.6762 O   0  0  0  0  0  0  0  0  0  0  0  0
    1.6870    1.6697   -2.4384 H   0  0  0  0  0  0  0  0  0  0  0  0
  1  2  1  0      
  2  3  2  0      
  3  4  1  0      
  4  5  1  0      
  5  6  1  0      
  6  1  1  0      
  4  7  1  0      
  7  8  1  0      
  8  9  1  0      
  9 10  1  0      
 10  5  1  0      
  4 11  1  0      
  3 12  1  0      
  9 13  1  0      
 10 14  1  0      
 10 15  1  0      
 15 16  1  0      
 16 17  2  0      
 17 18  1  0      
 18 19  2  0      
 19 20  1  0      
 20 21  2  0      
 21 16  1  0      
 21 22  1  0      
 18 23  1  0      
  5 24  1  0      
M  END
$$$$
