# Supplementary material for: Sources of Secondary Metabolite Variation in Dysidea avara (Porifera: Demospongiae): The Importance of Having Good Neighbors
Source: MDPI journal article supplement (doi:10.3390/md11020489), 2013-02-18
Supplement: s2 [file s2]

marinedrugs-11-00489-s001.mol
  ChemDraw04241410162D

 24 26  0  0  0  0  0  0  0  0999 V2000
   -1.8759   -0.7276    0.0000 C   0  0  0  0  0  0  0  0  0  0  0  0
   -1.8759   -1.5526    0.0000 C   0  0  0  0  0  0  0  0  0  0  0  0
   -1.1614   -1.9651    0.0000 C   0  0  0  0  0  0  0  0  0  0  0  0
   -0.4469   -1.5526    0.0000 C   0  0  0  0  0  0  0  0  0  0  0  0
   -0.4469   -0.7276    0.0000 C   0  0  0  0  0  0  0  0  0  0  0  0
   -1.1614   -0.3151    0.0000 C   0  0  0  0  0  0  0  0  0  0  0  0
    0.2675   -1.9651    0.0000 C   0  0  0  0  0  0  0  0  0  0  0  0
    0.9820   -1.5526    0.0000 C   0  0  0  0  0  0  0  0  0  0  0  0
    0.9820   -0.7276    0.0000 C   0  0  0  0  0  0  0  0  0  0  0  0
    0.2675   -0.3151    0.0000 C   0  0  0  0  0  0  0  0  0  0  0  0
   -0.4469   -2.3776    0.0000 C   0  0  0  0  0  0  0  0  0  0  0  0
   -1.1614   -2.7901    0.0000 C   0  0  0  0  0  0  0  0  0  0  0  0
    1.6965   -0.3151    0.0000 C   0  0  0  0  0  0  0  0  0  0  0  0
    0.6800    0.3994    0.0000 C   0  0  0  0  0  0  0  0  0  0  0  0
   -0.1450    0.3994    0.0000 C   0  0  0  0  0  0  0  0  0  0  0  0
    0.0686    1.1963    0.0000 C   0  0  0  0  0  0  0  0  0  0  0  0
    0.8655    1.4098    0.0000 C   0  0  0  0  0  0  0  0  0  0  0  0
    1.0790    2.2067    0.0000 C   0  0  0  0  0  0  0  0  0  0  0  0
    0.4956    2.7901    0.0000 C   0  0  0  0  0  0  0  0  0  0  0  0
   -0.3013    2.5765    0.0000 C   0  0  0  0  0  0  0  0  0  0  0  0
   -0.5148    1.7797    0.0000 C   0  0  0  0  0  0  0  0  0  0  0  0
   -1.3117    1.5661    0.0000 O   0  0  0  0  0  0  0  0  0  0  0  0
    1.8759    2.4202    0.0000 O   0  0  0  0  0  0  0  0  0  0  0  0
   -0.4469    0.0974    0.0000 H   0  0  0  0  0  0  0  0  0  0  0  0
  1  2  1  0      
  2  3  2  0      
  3  4  1  0      
  4  5  1  0      
  5  6  1  0      
  6  1  1  0      
  4  7  1  0      
  7  8  1  0      
  8  9  1  0      
  9 10  1  0      
 10  5  1  0      
  4 11  1  1      
  3 12  1  0      
  9 13  1  1      
 10 14  1  1      
 10 15  1  6      
 15 16  1  0      
 16 17  2  0      
 17 18  1  0      
 18 19  2  0      
 19 20  1  0      
 20 21  2  0      
 21 16  1  0      
 21 22  1  0      
 18 23  1  0      
  5 24  1  6      
M  END
